## **Dietary Vitamin B<sub>12</sub> reduces amyloid- $\beta$ proteotoxicity by alleviating oxidative stress and mitochondrial dysfunction**

Andy B. Lam<sup>1</sup>, Kirsten Kervin<sup>1</sup>, and Jessica E. Tanis<sup>1,\*</sup>

<sup>1</sup>Department of Biological Sciences, University of Delaware, Newark, DE 19716

\*Correspondence: [jtanis@udel.edu](mailto:jtanis@udel.edu)

**Keywords:** amyloid- $\beta$ , vitamin B<sub>12</sub>, diet, mitochondrial dysfunction, methionine synthase, homocysteine, methionine, Alzheimer's disease, *C. elegans*

## SUMMARY

Alzheimer's disease (AD) is a devastating neurodegenerative disorder with no effective treatment. Diet, as a modifiable risk factor for AD, could potentially be targeted to slow disease onset and progression. However, complexity of the human diet and indirect effects of the microbiome make it challenging to identify protective nutrients. Multiple factors contribute to AD pathogenesis including amyloid beta ( $A\beta$ ) deposition, mitochondrial dysfunction, and oxidative stress. Here we used *Caenorhabditis elegans* to define the impact of diet on  $A\beta$  proteotoxicity. We discovered that dietary vitamin B<sub>12</sub> alleviated mitochondrial fragmentation, bioenergetic defects, and oxidative stress, delaying  $A\beta$ -induced paralysis without affecting  $A\beta$  accumulation. Vitamin B<sub>12</sub> had this protective effect by acting as a cofactor for methionine synthase rather than as an antioxidant. Vitamin supplementation of B<sub>12</sub> deficient adult  $A\beta$  animals was beneficial, demonstrating potential for vitamin B<sub>12</sub> as a therapy to target pathogenic features of AD triggered by both aging and proteotoxic stress.

## INTRODUCTION

Alzheimer's Disease (AD), the most common cause of dementia, is a multifactorial neurodegenerative disorder characterized by accumulation of amyloid beta (A $\beta$ ) plaques, hyperphosphorylated tau, oxidative stress, mitochondrial dysfunction, and impaired glucose metabolism (Butterfield and Halliwell, 2019; Chakravorty et al., 2019; Lin and Beal, 2006; Long and Holtzman, 2019). Some AD risk factors including genetic predisposition and aging are non-modifiable while other risk factors such as diet can be altered to impact disease onset and progression (Thelen and Brown-Borg, 2020). Complex diets consist of macronutrients including carbohydrates, fats, and proteins, as well as vitamin and mineral micronutrients. It is challenging to determine which individual nutrients are neuroprotective in humans as well as other mammals due to organismal complexity, genetic diversity, and consumption of complex diets. Indirect dietary effects of gut microbiota, which provide micronutrients to the host, further complicate studies.

The genetically tractable nematode *Caenorhabditis elegans* eats a simple diet of *E. coli* in the laboratory. Consumption of different bacterial strains affects nematode gene expression, metabolic profile, development, fertility, fat storage, and lifespan (Brooks et al., 2009; Cabreiro et al., 2013; Cogliati et al., 2020; Han et al., 2017; MacNeil et al., 2013; Revtovich et al., 2019; Virk et al., 2012, 2016; Watson et al., 2014). With its genetic tools and short lifespan, *C. elegans* is an ideal system for the study of age-related diseases and has been used extensively to identify factors that influence A $\beta$  proteotoxicity (Fang et al., 2019; Han et al., 2017; Hassan et al., 2015; Lublin and Link, 2013; Sorrentino et al., 2017; Teo et al., 2019). Transgenic expression

of toxic human A $\beta$  peptides in *C. elegans* body wall muscles generates robust time-dependent paralysis as well as AD-like pathological features including defects in mitochondrial morphology, reduced ATP production, and oxidative stress (Drake et al., 2003; Fonte et al., 2011; Link, 1995; McColl et al., 2012; Sorrentino et al., 2017). Our goal was to use *C. elegans* to define the impact of diet on A $\beta$ -induced proteotoxicity.

We discovered that A $\beta$ -expressing *C. elegans* fed HB101 *E. coli* exhibited delayed paralysis, higher ATP levels, decreased mitochondrial fragmentation, and reduced reactive oxygen species compared to those raised on OP50 *E. coli*. Mild vitamin B<sub>12</sub> deficiency was observed in animals grown on OP50, but not HB101. We found that B<sub>12</sub> supplementation delayed A $\beta$ -induced paralysis of animals fed OP50, but did not have an additive impact on those that consumed HB101. The protective effects of vitamin B<sub>12</sub> required methionine synthase, indicating function as an enzyme cofactor. Vitamin B<sub>12</sub> supplementation in adulthood was beneficial for B<sub>12</sub> deficient *C. elegans*, suggesting that administration even late in life has potential as a therapeutic intervention to slow AD progression.

## RESULTS

### Diet alters A $\beta$ -induced paralysis in *C. elegans*

Extraneuronal A $\beta$  plaques (Long and Holtzman, 2019), coupled with genetic evidence (Chartier-Harlin et al., 1991; Goate et al., 1991), suggest that A $\beta$  accumulation is a causal factor in AD development. Transgenic expression of human A $\beta$ <sup>1-42</sup> in *C. elegans* muscles induces mitochondrial dysfunction, oxidative stress, and robust time-dependent

paralysis (Drake et al., 2003; Fonte et al., 2011; McColl et al., 2012). Altered time to paralysis has been used extensively to identify genes and pharmacological agents that influence A $\beta$  proteotoxicity (Cacho-Valadez et al., 2012; Han et al., 2017; Hassan et al., 2015; Lublin and Link, 2013; Sorrentino et al., 2017). While investigating the impact of genetic factors on A $\beta$ -induced paralysis, we noticed that animals fed OP50 B-type *E. coli* consistently paralyzed faster than those given HT115(DE3), an RNase III deficient K12 derived *E. coli* used for RNA interference experiments. To determine if diet was impacting A $\beta$  proteotoxicity, we gave A $\beta$  animals different *E. coli* diets and discovered that those fed HT115 or HB101, a B x K12 hybrid, exhibited a significant delay in paralysis compared to those that consumed OP50 (Figure 1A and S1A).

Since caloric restriction reduces A $\beta$  toxicity (Steinkraus et al., 2008), we first sought to determine if the altered time to paralysis was due to differences in bacterial growth or *C. elegans* feeding. We found no difference in bacterial concentration on OP50 and HB101 plates (Figure S1B) or pharyngeal pumping rates (Figure S1C) in *C. elegans* grown on the different diets. A $\beta$  animals fed DA837, another *E. coli* B strain that is hard for worms to ingest (Shtonda and Avery, 2006), exhibited paralysis indistinguishable from those given OP50 (Figure 1B,C). Finally, the HB101 diet was still protective in an *eat-2* mutant, which exhibits delayed A $\beta$ -induced paralysis due to dietary restriction (Figure S1D; Steinkraus *et al.* 2008). Together, these results suggest that the diet-induced shift in paralysis was not due to changes in ingestion or dietary restriction.

Reducing A $\beta$  levels delays paralysis (Sorrentino et al., 2017), so we next sought to establish if diet impacted A $\beta$  content. We observed no difference in A $\beta$  accumulation

between animals raised on OP50 and HB101 using immunoblotting (Figures 1D and S1E). We also utilized a genetic approach, using two mutants to determine if repression of protein synthesis is required for the HB101 protective effect. The GCN-2 kinase phosphorylates translation initiation factor 2 (eIF2 $\alpha$ ) during times of nutrient deprivation and mitochondrial stress (Baker *et al.* 2012; Rousakis *et al.* 2013). Loss of *gcn-2* did not affect the dietary shift in A $\beta$ -induced paralysis (Figure 1E). In response to misfolded protein accumulation, the endoplasmic reticulum UPR sensor PEK-1 phosphorylates eIF2 $\alpha$  (Shen *et al.*, 2005). *pek-1* mutants expressing A $\beta$  exhibited accelerated paralysis, however, the HB101 diet still caused a delay compared to OP50 (Figure 1F). Our results indicate that the HB101 diet reduces A $\beta$  proteotoxicity without affecting A $\beta$  accumulation.

### **Diet impacts mitochondrial morphology and function in A $\beta$ animals**

Bioenergetic deficits, which cause synaptic dysfunction in AD individuals, are exacerbated by A $\beta$  accumulation (Chakravorty *et al.*, 2019). *C. elegans* expressing A $\beta$  exhibit decreased ATP levels and defects in electron transport chain complex activity, thus impaired mitochondrial function is a fundamental consequence of A $\beta$  buildup (Fang *et al.*, 2019; Fong *et al.*, 2016; Sorrentino *et al.*, 2017; Teo *et al.*, 2019). Therefore, we tested the impact of diet on ATP levels and found that A $\beta$  animals fed HB101 exhibited a significant increase in ATP compared to those that consumed OP50 (Figure 2A). Diet had no impact on ATP levels in wild-type *C. elegans* (Figure 2A), indicating that the dietary protection was only required for animals under proteotoxic stress.

To elucidate the mechanism underlying the diet-induced change in ATP level, we assessed mitochondrial gene transcripts, protein levels, and morphology. Transcript levels of genes required for oxidative phosphorylation (Figure S2A) and mitochondrial protein content (Figure S2B,C) were unchanged between A $\beta$  animals fed the different diets. This suggests that the reduced ATP in animals that consumed OP50 was not due to fewer mitochondria, but rather, diminished function. A $\beta$  expression has been shown to disrupt mitochondrial network integrity, which is important for bioenergetic efficiency (Fonte et al., 2011; Sorrentino et al., 2017). *C. elegans* muscle mitochondria are arranged in a periodic pattern that can be visualized with red fluorescent protein (RFP) tagged TOMM-20 (Wei and Ruvkun, 2020). Mitochondrial fragmentation was observed in A $\beta$  animals compared to wild type (Figure 2B,C). To determine the effect of diet we quantified mitochondria length and found that the HB101 diet reduced fragmentation in both wild type and A $\beta$  animals (Figure 2C). Thus, diet and A $\beta$  expression had an additive effect, indicating that both of these factors impinge on mitochondrial morphology and function.

Oxidative stress, stemming from an imbalance between ROS production and antioxidant defenses, plays a causal role in AD pathogenesis. Mitochondrial fragmentation leads to increased production of reactive oxygen species (ROS) including superoxide ( $O_2^-$ ) and hydrogen peroxide ( $H_2O_2$ ), while A $\beta$  accumulation also promotes ROS formation (Drake et al., 2003; Lin and Beal, 2006; Wang et al., 2014). Therefore, we investigated the impact of A $\beta$  and diet on  $O_2^-$  and  $H_2O_2$  levels using ROS indicators. While expression of A $\beta$  resulted in a substantial increase in  $O_2^-$ , A $\beta$  animals fed HB101 had significantly reduced  $O_2^-$  levels compared to those raised on OP50 (Figure 2D).

Both wild type and A $\beta$  *C. elegans* raised on OP50 exhibited significantly higher H<sub>2</sub>O<sub>2</sub> than those on HB101 (Figure 2E,F). In conclusion, diet and A $\beta$  act in parallel to impact ATP levels, mitochondrial fragmentation, and oxidative stress, three pathological features of AD.

### **Vitamin B<sub>12</sub> protects against A $\beta$ -induced paralysis and mitochondrial dysfunction**

OP50 and HB101 differ in carbohydrate content and fatty acid composition (Brooks et al., 2009; Neve et al., 2020; Revtovich et al., 2019). Thus, we considered whether differences in these macronutrients could alter the paralysis of A $\beta$  worms.

Supplementation of plates with glucose (Figure 3A, S3A) or fatty acids (Figure 3B, S3A) did not eliminate the dietary shift in A $\beta$ -induced paralysis, suggesting that these macronutrients are not responsible for the impact of diet. However, A $\beta$  animals raised on OP50 supplemented with glucose paralyzed significantly faster than those fed standard OP50, consistent with reports of excess glucose reducing mitochondrial respiration and shortening lifespan (Lee et al., 2009; Schulz et al., 2007).

Supplementation of HB101 plates with glucose did not have any effect suggesting that the nutrient in HB101 that protects against A $\beta$  proteotoxicity may also alleviate mitochondrial dysfunction resulting from high glucose.

*E. coli* strains also differ in micronutrient content and *C. elegans*, like humans, must obtain several essential vitamins from their diet. Mild vitamin B<sub>12</sub> deficiency is observed in animals fed OP50, which has reduced expression of the *tonB* transporter that mediates B<sub>12</sub> uptake (Revtovich et al., 2019; Watson et al., 2014). *C. elegans* vitamin B<sub>12</sub> status can be assessed using a *Pacdh-1::GFP* reporter, which is expressed



in response to propionic acid accumulation resulting from B<sub>12</sub> deficiency (MacNeil et al., 2013; Revtovich et al., 2019; Watson et al., 2014, 2016; Wei and Ruvkun, 2020). GFP was highly expressed in animals grown on OP50 and DA837, the diets that led to more rapid paralysis of A $\beta$  worms, and B<sub>12</sub> supplementation suppressed GFP expression (Figure 3D). In contrast, GFP expression was repressed in *C. elegans* that ate the HB101 and HT115 protective diets, suggesting high B<sub>12</sub> levels (Figure 3D). Supplementation of OP50 plates with vitamin B<sub>12</sub> delayed A $\beta$ -induced paralysis, while addition of vitamin B<sub>12</sub> to HB101 plates did not have any added protective effect (Figure 3C, S3A). This suggests that the dietary shift in paralysis onset was due to differences in vitamin B<sub>12</sub> availability.

We next sought to determine the impact of vitamin B<sub>12</sub> on mitochondrial dysfunction, morphology defects, and ROS levels. A $\beta$  *C. elegans* fed OP50 with B<sub>12</sub> supplementation had significantly higher ATP levels compared to non-supplemented counterparts, while B<sub>12</sub> had no effect on animals raised on HB101 (Figure 3E). B<sub>12</sub> supplementation did not affect mitochondrial protein levels (Figure S2B,C). Instead, B<sub>12</sub> supplementation decreased mitochondrial fragmentation in A $\beta$  animals fed OP50 without impacting mitochondria length in those given HB101 (Figure 3F). Severe B<sub>12</sub> deficiency in *C. elegans* increases H<sub>2</sub>O<sub>2</sub> content and decreases antioxidant defense (Bito et al., 2017). We found that addition of B<sub>12</sub> to OP50 plates significantly reduced H<sub>2</sub>O<sub>2</sub> and O<sub>2</sub><sup>-</sup> in A $\beta$  animals to levels observed in those raised on HB101 (Figure 3G,H). Together these results show that vitamin B<sub>12</sub> supplementation gives rise to protective outcomes in animals fed the OP50 diet.

## **Vitamin B<sub>12</sub> given during adulthood has protective effects**

Subclinical B<sub>12</sub> deficiency is common primarily in older individuals (Green et al., 2017). Thus, we sought to determine if manipulation of B<sub>12</sub> availability during adulthood impacted A $\beta$  proteotoxicity in *C. elegans*. Removal of vitamin B<sub>12</sub> at the beginning of adulthood led to A $\beta$ -induced paralysis indistinguishable from that observed in animals raised on OP50 their entire life (Figure 3I, S3B). This demonstrates that a decrease in vitamin B<sub>12</sub> levels in adulthood exacerbates A $\beta$  proteotoxicity. Further, we discovered that A $\beta$  animals first grown on OP50 then supplemented with B<sub>12</sub> only in adulthood exhibited the same delay in paralysis as those fed a vitamin B<sub>12</sub> rich diet their entire lifespan (Figure 3J, S3B). These results suggest potential for dietary vitamin B<sub>12</sub> supplementation as an AD treatment even after onset of the disease.

## **Protective effects of dietary B<sub>12</sub> require methionine synthase**

Vitamin B<sub>12</sub> is an essential cofactor for methylmalonyl coenzyme A (CoA) mutase (*C. elegans* MMCM-1), which converts methylmalonyl-CoA to succinyl-CoA in the propionyl-CoA breakdown pathway, and methionine synthase (*C. elegans* METR-1), which converts homocysteine (Hcy) to methionine in the methionine/S-Adenosylmethionine (SAM) cycle (Figure 4A). To define which pathway is required for the B<sub>12</sub> protective effects, we determined the impact of mutations in propionyl-CoA carboxylase *pcca-1*, which acts upstream of *mmcm-1*, and *metr-1* on A $\beta$ -induced paralysis. Loss of *pcca-1* had no effect on A $\beta$  animals grown on the different bacteria (Figure 4B, S4A), but the dietary shift in paralysis was eliminated in the *metr-1* mutant (Figure 4C, S4B). While OP50 causes mild vitamin B<sub>12</sub> deficiency, loss of *metr-1* entirely disrupts the

methionine/SAM cycle and resulted in an even more severe phenotype (Figure 4C, S4B). Consistent with the behavioral data, loss of *metr-1* in A $\beta$  animals drastically reduced ATP levels and abolished the HB101 protective effect (Figure 4D). H<sub>2</sub>O<sub>2</sub> and O<sub>2</sub><sup>-</sup> content was also the same in *metr-1* A $\beta$  animals raised on OP50 and HB101, though loss of *metr-1* decreased ROS levels, possibly due to reduced oxidative phosphorylation (Figure 4E,F). These results indicate that the methionine/SAM cycle is required for vitamin B<sub>12</sub> protection.

B<sub>12</sub> deficiency reduces methionine synthase activity and can lead to Hcy accumulation. We found that A $\beta$  animals grown on OP50 had significantly increased Hcy, which was reduced by B<sub>12</sub> supplementation (Figure 4G). Hyperhomocysteinemia is a modifiable risk factor for AD and results in oxidative stress (Bito et al., 2017; Smith and Refsum, 2016). Thus, we sought to determine the effect of Hcy on A $\beta$ -induced paralysis. Hcy supplementation accelerated paralysis of A $\beta$  animals on both diets, but did not impact the dietary shift. This suggests that the increased Hcy in animals fed OP50 did not underlie the effect of low dietary vitamin B<sub>12</sub> (Figure 4H, S4C). We then tested methionine supplementation and discovered no difference in the time to paralysis between A $\beta$  animals that consumed OP50 and HB101 (Figure 4I, S4C). Methionine supplementation eliminated the dietary shift by having a beneficial effect on A $\beta$  animals fed OP50 and a detrimental impact on those grown on HB101 (Figure 4I, S4C). These data are consistent with a model in which vitamin B<sub>12</sub> dependent methionine synthase activity controls methionine levels to reduce A $\beta$  proteotoxicity.

## DISCUSSION

Diet is a modifiable risk factor for AD, however, the impact of specific micronutrients on disease onset and progression is difficult to define due to human genetic diversity and diet complexity. Here we used the genetically tractable nematode *C. elegans*, which consumes a simple *E. coli* diet, and discovered that vitamin B<sub>12</sub> reduces A $\beta$  proteotoxicity. In A $\beta$ -expressing animals, vitamin B<sub>12</sub> increased energy output, reduced mitochondrial fragmentation, and decreased ROS, but did not impact A $\beta$  levels. There is currently no effective disease-modifying treatment for AD and therapeutics designed to reduce A $\beta$  levels have failed (Long and Holtzman, 2019). Our results suggest that vitamin B<sub>12</sub> supplementation could be a therapeutic approach to target mitochondrial dysfunction and oxidative stress, pathogenic features of AD triggered by both aging and proteotoxic stress.

Subclinical B<sub>12</sub> deficiency is common, with a prevalence of 10-15% among individuals over the age of 60 and up to 35% among those older than 80 years (Green et al., 2017) and low B<sub>12</sub> status may be a modifiable risk factor for AD (Vogiatzoglou et al., 2008). Meta-analyses of clinical trials have suggested that administration of B vitamins does not prevent cognitive decline (Clarke et al., 2014; Ford and Almeida, 2019). However, most participants did not exhibit pre-existing cognitive defects, trial durations were not sufficient to observe decline, and prior B<sub>12</sub> status was not considered. Our results show that vitamin B<sub>12</sub> supplementation was beneficial for A $\beta$ -expressing *C. elegans* with mild B<sub>12</sub> deficiency, but did not offer additional protection for non-deficient animals. Consistent with our work, studies focused on individuals with low dietary vitamin B showed that supplementation with B vitamins preserved cognition (Kang et al., 2008) and

slowed brain atrophy (Smith et al., 2010). Thus, the therapeutic potential for vitamin B<sub>12</sub> is likely to depend on pre-existing B<sub>12</sub> status. How genetic profile and other components of the complex human diet further impact probability of vitamin B<sub>12</sub> therapeutic success will need to be resolved.

Dietary B<sub>12</sub> had no effect on ATP levels in wild type *C. elegans*, suggesting that vitamin B<sub>12</sub> deficiency is detrimental only during cellular stress. We found that both A $\beta$  accumulation and low B<sub>12</sub> increased oxidative stress and mitochondrial fragmentation. Since mitochondrial morphology and redox homeostasis are bi-directionally linked, elevated ROS due to A $\beta$  accumulation and mitochondrial fragmentation likely exacerbates mitochondrial defects. Net mitochondrial morphology is defined by fission and fusion as well as removal of damaged mitochondria by mitophagy. Defects in mitophagy decrease ATP levels, elevate ROS, and accelerate A $\beta$ -induced phenotypes (Fang et al., 2019; Palikaras et al., 2015; Sorrentino et al., 2017). Low vitamin B<sub>12</sub> does not impact mitophagy, but instead promotes mitochondrial fission (Wei and Ruvkun, 2020) and increases oxidative stress (Bito et al., 2017). Thus, vitamin B<sub>12</sub> and A $\beta$  accumulation may act via different mechanisms to impinge on mitochondrial morphology and thus function.

In *C. elegans*, vitamin B<sub>12</sub> causes resistance to pathogen stress and this requires methylmalonyl-CoA mutase (Revtovich et al., 2019). In contrast, our work showed that vitamin B<sub>12</sub> had no effect on *metr-1* mutant A $\beta$  animals, indicating that B<sub>12</sub> offers protection against proteotoxic stress by acting as a cofactor for methionine synthase. Methionine supplementation eliminated the dietary shift in A $\beta$ -induced paralysis, but the median time was intermediate to that of animals grown on OP50 and HB101 diets,

suggesting that too much methionine can also have a detrimental effect. While methionine restriction causes mitochondrial fragmentation in *C. elegans* (Lin and Wang, 2017; Wei and Ruvkun, 2020), it extends lifespan in other organisms (Grandison et al., 2009; Orentreich et al., 1993). Our work shows the importance of vitamin B<sub>12</sub> in establishing the proper methionine level to reduce mitochondrial dysfunction and oxidative stress in *C. elegans* under proteotoxic stress.

## **SUPPLEMENTAL INFORMATION**

Supplemental information includes four figures and can be found with this article online.

## **ACKNOWLEDGEMENTS**

We thank Jeffrey Caplan from the University of Delaware BioImaging Center for writing the script to measure mitochondrial length. Nematode strains were provided by the *Caenorhabditis* Genetics Center, which is supported by the NIH-ORIP (P40 OD010440). Microscopy access was supported by grants from the NIH-NIGMS (P20 GM103446), NSF (IIA-1301765), and State of Delaware. This work was supported by an NIH-NIGMS INBRE (P20 GM103446) Pilot Project grant and University of Delaware Research Foundation Award #18A00929 (to J.E.T.).

## **AUTHOR CONTRIBUTIONS**

Conceptualization, A.B.L, K.K., and J.E.T.; Investigation, A.B.L. and K.K.; Writing – Original Draft, A.B.L. and J.E.T.; Writing – Review and Editing, A.B.L., K.K., and J.E.T.; Visualization, A.B.L. and J.E.T.; Supervision, J.E.T.; Funding Acquisition, J.E.T.

## DECLARATION OF INTERESTS

The authors declare no competing interests.

## FIGURE LEGENDS

### Figure 1: Diet impacts A $\beta$ -induced paralysis without altering A $\beta$ accumulation

- (A) A $\beta$  animals fed HB101 (grey) and HT115 (red) exhibited delayed paralysis compared to those on OP50 (black).
- (B) A $\beta$  animals fed DA837 (blue) and OP50 (black) paralyzed at the same time.
- (C) Median time to paralysis for A $\beta$  animals fed OP50 (black), HB101 (grey), HT115 (red), and DA837 (blue) *E. coli* (n $\geq$ 3).
- (D) Western analysis showed no effect of diet on A $\beta$  accumulation; additional replicates in Figure S1E.
- (E) Loss of *gcn-2* in A $\beta$  animals raised on either diet did not affect median time to paralysis (n=4).
- (F) Loss of *pek-1* accelerated A $\beta$ -induced paralysis, but HB101 still caused a delay compared to OP50 (n=3).

Error bars show SEM; \*p<0.05, \*\*p<0.01, \*\*\*p<0.001

### Figure 2: Diet affects mitochondrial function and morphology in A $\beta$ *C. elegans*

- (A) ATP levels in A $\beta$  *C. elegans* fed OP50 were reduced compared to wild type (WT); the HB101 diet increased ATP in A $\beta$  animals (n $\geq$ 8).

- (B) Representative images of mitochondria, visualized with a TOMM-20::RFP fusion protein, in WT and A $\beta$  animals. Scale = 10  $\mu$ m.
- (C) Average mitochondrial length was affected by A $\beta$  accumulation and diet; individual measurements (grey symbols, n $\geq$ 30) indicated.
- (D) Superoxide (O $_2^{\cdot-}$ ), measured with MitoSox, was higher in A $\beta$  animals fed OP50 versus HB101 (n $\geq$ 11).
- (E) Hydrogen peroxide (H $_2$ O $_2$ ) level, quantified with Amplex Red, was greater in both WT and A $\beta$  nematodes given OP50 (n $\geq$ 7).
- (F) H $_2$ O $_2$ , measured with H $_2$ DCFDA, was increased in WT and A $\beta$  animals fed OP50 (n $\geq$ 8).
- Error bars show SEM; \*p<0.05, \*\*p<0.01, \*\*\*p<0.001

**Figure 3: Vitamin B $_{12}$  is the protective factor in the HB101 diet**

- (A) Supplementation with 10mM glucose accelerated paralysis of A $\beta$  animals fed OP50, but did not eliminate the dietary shift.
- (B) Supplementation with 0.3mM fatty acids did not affect A $\beta$ -induced paralysis.
- (C) Supplementation with 148nM vitamin B $_{12}$  eliminated the impact of bacterial diet on paralysis of A $\beta$  animals.
- (D) *Pacdh-1::GFP* expression was induced in animals fed OP50 and DA837, but not OP50+B $_{12}$ , HB101, HB101+B $_{12}$ , and HT115.
- (E) Vitamin B $_{12}$  increased ATP levels in A $\beta$  animals fed OP50 compared to those without supplementation (no sup.; n=6).



- (F) Vitamin B<sub>12</sub> increased average mitochondrial length in A $\beta$  animals fed OP50 (n=30).
- (G) Vitamin B<sub>12</sub> reduced H<sub>2</sub>O<sub>2</sub>, measured with H<sub>2</sub>DCFDA, in A $\beta$  animals fed OP50 (n=9).
- (H) Vitamin B<sub>12</sub> decreased O<sub>2</sub><sup>-</sup>, measured with MitoSox, in A $\beta$  animals fed OP50 (n $\geq$ 6).
- (I) Transfer of animals from vitamin B<sub>12</sub> plates to OP50 at the end of the L4 stage eliminated the protective effect.
- (J) Transfer of A $\beta$  animals fed OP50 to vitamin B<sub>12</sub> plates at the end of the L4 stage delayed paralysis.
- Error bars show SEM; \*p<0.05, \*\*\*p<0.001

**Figure 4: Methionine synthase is required for the protective effects of vitamin B<sub>12</sub>**

- (A) Diagram of vitamin B<sub>12</sub> dependent pathways in *C. elegans*. Genes encoding enzymes that function in the methionine/SAM cycle (blue) and the canonical B<sub>12</sub> pathway (red) are indicated. SAM, S-adenosylmethionine; SAH, s-adenosyl-l-homocysteine.
- (B) Loss of *pcca-1* did not affect paralysis of A $\beta$  animals.
- (C) Loss of *metr-1* accelerated A $\beta$ -induced paralysis and eliminated the dietary shift.
- (D) In *metr-1* mutant A $\beta$  animals, ATP levels were low and unaffected by diet (n=4).
- (E) H<sub>2</sub>O<sub>2</sub> levels were unaffected by diet in *metr-1* mutant A $\beta$  animals (n=4).
- (F) In *metr-1* mutant A $\beta$  animals, O<sub>2</sub><sup>-</sup> levels were unaffected by diet (n=4).

(G) A $\beta$  animals grown on OP50 had higher levels of Hcy compared to those raised on HB101 or B<sub>12</sub> supplemented plates (n=4).

(H) Supplementation with 15mM Hcy accelerated paralysis of A $\beta$  animals grown on both OP50 and HB101, but did not eliminate dietary shift.

(I) Supplementation with 13.4mM L-methionine eliminated the diet-induced shift in paralysis.

Error bars show SEM; \*p<0.05, \*\*\*p<0.001

**Supplemental Figure 1: The impact of diet on A $\beta$ -induced paralysis is not due to dietary restriction, variation in ingestion, or differences in A $\beta$  accumulation.**

(A) Dietary protective effects were not limited to the GMC101 A $\beta$ -expressing strain. CL4176 nematodes, which also express A $\beta$  in the body wall muscles, paralyzed slower when fed HB101 (grey) compared to OP50 (black).

(B) OD<sub>600</sub> measurements showed no significant difference in bacterial growth between OP50 (black) and HB101 (gray) indicating that the A $\beta$  nematodes were exposed to the same amount of bacteria when grown on these diets (n=9).

(C) Pharyngeal pumping rates were not different between WT and A $\beta$  nematodes on OP50 (black) and HB101(gray) bacteria (n $\geq$ 28).

(D) Loss of *eat-2* delayed A $\beta$ -induced paralysis in animals grown on both OP50 (red) and HB101 (pink), but HB101 still caused a delay compared to OP50; three biological replicates performed.

(E) As in Figure 1D, two additional Western replicates presented here showed no effect of diet on A $\beta$  accumulation; five biological replicates performed in total.

## **Supplementary Figure 2: Diet has no impact on oxidative phosphorylation gene transcript levels or mitochondrial protein content**

- (A) qRT-PCR analysis of transcripts from representative genes required for oxidative phosphorylation ( $n \geq 3$ ). No significant differences were observed between wild type and A $\beta$  animals grown on the two different diets. Error bars represent SEM.
- (B) Western analysis of NUO-2, a component of mitochondrial complex I; the  $\alpha$ -tubulin control was detected on the same blot as NUO-2.
- (C) Quantification of NUO-2 signal, normalized to the  $\alpha$ -tubulin control from the same blot. There was no significant difference in NUO-2 protein between animals grown on OP50 and HB101, with or without vitamin B<sub>12</sub> supplementation. Analysis was performed using Image J on five biological replicates, all run on different gels.

## **Supplementary Figure 3: Dietary vitamin B<sub>12</sub> in adulthood delays A $\beta$ -induced paralysis**

- (A) Median time to paralysis for A $\beta$  nematodes fed either OP50 (black) or HB101 (grey) on NGM plates with glucose, fatty acids, vitamin B<sub>12</sub>, or no supplementation ( $n \geq 3$ ); ## $p < 0.001$  compared to OP50 without B<sub>12</sub>.
- (B) Median time to paralysis for A $\beta$  nematodes fed OP50 without supplementation (black) or with B<sub>12</sub> introduced (orange) or removed (purple) at the end of the L4 stage ( $n = 3$ ); compare to those raised on HB101 (grey).

Error bars show SEM; \* $p < 0.05$ , \*\* $p < 0.01$ , \*\*\* $p < 0.001$

## **Supplementary Figure 4: B<sub>12</sub> deficiency causes defects in the methionine/SAM cycle and an increase in homocysteine levels**

(A) Median time to paralysis showed that loss of *pcca-1* had no impact on A $\beta$ -induced paralysis (n=3).

(B) Median time to paralysis was not significantly different between A $\beta$ -expressing *metr-1* mutants raised on OP50 or HB101 (n=3). For paralysis assays, error bars show SEM; \* $p < 0.05$ , \*\* $p < 0.01$ .

(C) Average change in median time to paralysis (hrs) for A $\beta$  animals on plates supplemented with Hcy (purple) or L-methionine (orange) compared to the respective diet controls (n=3). Error bars show SEM, # $p < 0.05$  compared to OP50 without supplementation, \* $p < 0.05$  compared to HB101 without supplementation, \*\*\* $p < 0.001$  between animals raised on methionine supplemented OP50 and HB101 plates.

## **STAR METHODS**

## **KEY RESOURCES TABLE**

See additional file

## **CONTACT FOR REAGENT AND RESOURCE SHARING**

Further information and reagent requests should be directed to and will be fulfilled by the Lead Contact, J.E. Tanis ([jtanis@udel.edu](mailto:jtanis@udel.edu))

## **EXPERIMENTAL MODEL AND SUBJECT DETAILS**

### **Nematode Culture**

All *C. elegans* strains were maintained on nematode growth medium (NGM) at 20°C as described (Brenner, 1974). The wild-type strain was Bristol N2; all other strains used in this study can be found in the Key Resources Table. *eat-2(ad465)* was detected with SuperSelective genotyping (Touroutine and Tanis, 2020); standard duplex PCR genotyping was used for all deletion mutants.

## **METHOD DETAILS**

### **Bacterial Strains**

*Escherichia coli* strains used in this study include OP50, HB101, HT115, and DA837. Bacterial cultures for assay plates were grown in LB overnight shaking at 37°C to an OD<sub>600</sub> of 1.0 (Eppendorf BioPhotometer D30) and seeded onto NGM plates. All plates were dried for three days at room temperature and stored at 4°C before use. Relative amount of bacteria on seeded plates was measured by washing bacteria off plates with M9 buffer following a 24 hour temperature shift to 25°C and OD<sub>600</sub> was measured using a BioPhotometer D30 (Eppendorf).

### **A $\beta$ -induced Paralysis Assay**

Animals were synchronized by a pulse egg lay for paralysis assays, however, we note that the dietary shift in paralysis was also observed with worms synchronized by bleaching or picking of late fourth larval stage (L4) animals to assay plates (not shown). Four adult animals were placed on 6 cm NGM plates seeded with different bacteria for 4 hours and then removed. The animals grew at 20°C and then were shifted to 25°C when the majority reached the late L4 stage, identified by a white crescent with black central dot at the vulva. Starting 12 to 20 hours post temperature upshift, depending on the genotype of the strain being assayed, the number of paralyzed and non-paralyzed animals were counted every two hours. Due to substantial acceleration of A $\beta$ -induced paralysis in *pek-1* mutants, animals were assessed for movement every hour following temperature upshift until all paralyzed. At least 45 animals were assayed per trial and a minimum of three biological replicates were performed per *C. elegans* strain / bacterial condition. Data were used to generate Kaplan-Meier survival plots and determine median time to paralysis (GraphPad Prism).

### **Nutrient and Metabolite Supplementation**

To make the nutrient supplemented plates for paralysis assays 10mM D(+)-glucose (Fisher Scientific), 0.3mM sodium homogamma linolenate solution (Nu-Chek Prep), 148nM methylcobalamin (Millipore Sigma), 13.4mM L-methionine (Fisher Scientific), or 15mM DL-Homocysteine (Millipore Sigma) were added to autoclaved NGM media at 55°C. These concentrations of glucose (Alcántar-Fernández et al., 2018), fatty acids (Deline et al., 2013), methylcobalamin (Revtovich et al., 2019), L-methionine (Wei and Ruvkun, 2020), and homocysteine (Wei and Ruvkun, 2020) were used in prior work.

Plates were stored at 4°C. Fatty acid supplemented plates were covered with foil to prevent light oxidation. Plates were seeded with the different *E. coli* cultures (OD<sub>600</sub> = 1.0) and dried for three days before use.

### **Mitochondrial imaging and analysis**

Mitochondrial morphology was visualized by imaging *C. elegans* expressing RFP-tagged TOMM-20 (Pmyo-3::tomm-20::mKate2::HA::tbb-2 3' UTR) 24 hours after temperature upshift of late L4 animals to 25°C. Animals were immobilized with 10 µM levamisole on 3% agar pads and Z-stack images were obtained with a Zeiss LSM880 confocal microscope. Images were analyzed with ImageJ by drawing a ROI around muscles and using the script below to determine mitochondrial length. Values below 1 µm were excluded, then average branch length was calculated. Images from at least thirty animals were analyzed for each condition. The following script was used:

```
run("Clear Results"); run("Median...", "radius=1.5"); run("Unsharp Mask...", "radius=2.5 mask=0.90"); setAutoThreshold("Li dark"); //run("Threshold...");  
setOption("BlackBackground", true); run("Convert to Mask"); run("Skeletonize (2D/3D)");  
run("Analyze Skeleton (2D/3D)", "prune=[shortest branch] prune_0 calculate show display"); run("Summarize");
```

### **Vitamin B<sub>12</sub> reporter imaging**

Images of *Pacdh-1::gfp* expression were taken of adult animals (24 hours post L4) that had been immobilized 3% agarose pads with 10 µM levamisole. All images were

collected under identical exposure conditions using a Zeiss AxioZoom V16 microscope with AxioCam 702 mono camera and ZEN 2.3 Digital Imaging System.

### **ATP, ROS and Homocysteine Quantification**

Approximately 1000 first larval stage (L1) animals synchronized by bleaching were grown on 10 cm plates at 20°C. Once the animals reached late L4, plates were shifted to 25°C for 24 hours (Figures 2 and 3) or 18 hours (Figure 4). Animals were washed 3x with 1x M9 and sonicated on ice with Tris-EDTA buffer (100mM Tris, 4mM EDTA pH 7.75) using a model 150V/T Ultrasonic Homogenizer for 5 minutes, then centrifuged at 14,000 RPM for 15 minutes at 4°C. The supernatant was collected and moved to a fresh tube. ATP quantitation was performed with the ATP Bioluminescence Assay Kit CLS II (Roche Diagnostics) using a Glomax 96 Microplate Luminometer as described (Chaya *et al*, 2021). ATP was normalized to protein content measured with the Pierce BCA protein assay kit (ThermoFisher Scientific). Triplicate technical replicates were performed for each sample; at least four biological samples were assayed for each dietary condition.

For ROS quantification, animals were prepared as for ATP quantification except animals were sonicated on ice in M9 buffer. To normalize samples, the Pierce BCA protein assay kit was used to determine supernatant volume required for 25 µg of protein. Hydrogen peroxide levels were measured using 2',7'-Dichlorofluorescein diacetate/H<sub>2</sub>DCFDA (Sigma-Aldrich) as described in (Yoon *et al.*, 2018). Briefly 50 µL of 50 µM H<sub>2</sub>DCFDA was added to normalized worm samples in black 96 well plates, incubated at room temperature for 6 hours before fluorescence was measured. The



Amplex Red Hydrogen Peroxide/Peroxidase Assay Kit (ThermoFisher Scientific) was also used to measure hydrogen peroxide levels. Superoxide levels were assessed with the MitoSox Red Mitochondrial Superoxide Indicator Kit (ThermoFisher Scientific) following manufacturers protocols. Fluorescence and absorbance values were measured using the Glomax 96 Microplate Luminometer. Triplicate technical replicates were performed for each sample; at least six biological samples were assayed for each dietary condition.

For homocysteine quantification, animals were prepared as for ROS quantitation. Homocysteine levels in supernatants containing 25 µg of protein were determined using the Homocysteine Assay Fluorometric Kit (Abcam) following manufacturer instructions. Fluorescence was measured with use of the Glomax 96 Microplate Luminometer. Triplicate technical replicates were performed for each sample; at least four biological samples were assayed for each condition.

## **Western Blotting**

Eggs from gravid adults were isolated by bleaching and allowed to hatch rocking in M9 buffer overnight. Approximately 5000 starved L1s were pipetted onto each plate the following day. Plates were moved to 25°C when a majority of animals were late L4 and 24 hours later, worms were washed 3x with M9 and the pellet was flash frozen. 100 µL lysis buffer (100mM NaCl, 100mM Tris pH 7.5, 1% NP-40) supplemented with an EDTA-free Protease Inhibitor cocktail tablet (Roche) was added to the pellet, sonicated on ice (Model 150V/T Ultrasonic Homogenizer), and centrifuged 15 minutes at 4°C. The supernatant was transferred to a new tube and 20 µL was set aside for protein

quantification (Pierce BCA protein assay kit). 2x protein sample buffer (80 mM Tris-HCl, 2% SDS, 10% glycerol, 0.0006% Bromophenol blue with 10%  $\beta$ -mercaptoethanol and 8M Urea) was added to the supernatant. Samples were heated at 55° C for 5 minutes and 30  $\mu$ g of protein per sample was run on Tris-Tricine 16.5% precast polyacrylamide gels (BioRad) for A $\beta$  or 10% Tris-Glycine (TGX) precast protein gels (BioRad) for NUO-2. Samples were transferred onto 0.2  $\mu$ m (A $\beta$ ) or 0.45  $\mu$ m (NUO-2) nitrocellulose membranes (BioRad) for 40 minutes at 70V. Membranes were blocked in 5% non-fat milk in TBS with 0.1% Tween-20 one hour at room temperature. Primary antibody incubation was overnight at 4°C; incubation with a secondary antibody conjugated to horseradish peroxidase was 1 ½ hrs. at room temperature. Chemiluminescence detection used SuperSignal West Pico PLUS (ThermoFisher Scientific) and a Chemidoc MP Imaging System (BioRad). NUO-2 and the  $\alpha$ -tubulin loading control were detected together on the same membrane, however, A $\beta$  membranes had to be stripped and reprobed with the loading control antibody to ensure equal protein loading across gels. Antibodies for A $\beta$  (6E10 Biologend cat#803001, 1:1000), NUO-2 (Abcam cat#ab14711, 1:5000),  $\alpha$ -tubulin (Sigma cat#T9026, 1:5000), and goat anti-Mouse IgG-HRP (ThermoFisher Scientific cat#31430, 1:5000) were used in this study. All experiments were done with five biological replicates.

### **qRT-PCR**

*C. elegans* were synchronized as described for Western blotting. 24 hrs after temperature upshift, animals were washed 3 times with M9 and 1 time with non-DEPC treated RNase free water, then transferred to a microcentrifuge tube. 400  $\mu$ L of Trizol

(ThermoFisher Scientific) was added and samples were flash frozen. RNA was isolated using the RNeasy Mini Kit (Qiagen). Briefly, 200  $\mu$ L of Trizol were added to thawed samples along with 140  $\mu$ L of chloroform (ThermoFisher Scientific). Samples were centrifuged, the aqueous layer was removed, and equal volume of 70% ethanol was added. RNeasy spin columns (Quiagen) were used for on-column DNase treatment. Total RNA was transcribed into cDNA using the iScript cDNA Synthesis kit (BioRad). qRT-PCR was performed with PowerUp SYBR Green Master Mix (Applied Biosystems) using a Quantstudio 6 Flex Real-time PCR System (ThermoFisher Scientific) following the standard cycling mode with an anneal/extend temperature at 58°C followed by a default dissociation step. *act-2* was used as the housekeeping reference. The  $\Delta\Delta C_t$  method was used to determine relative expression. Triplicate technical replicates were performed for each sample; data presented are from at least three biological replicates per condition.

### **Pharyngeal Pumping Rate Measurements**

Animals were grown at 20°C to early L4 stage. Using the Zeiss AxioZoom V16 microscope the number of pharyngeal pumps per 30 seconds was counted. At least 28 animals were measured per diet.

### **Statistical Analysis**

Data were analyzed with one-way ANOVA, performing multiple comparisons with the Dunnett test. Statistical analyses and graphing were performed with GraphPad Prism 7. Significant differences indicated as \* $p < 0.05$ , \*\* $p < 0.01$ , \*\*\* $p < 0.001$ , \*\*\*\* $p < 0.0001$ .

## REFERENCES

- Alcántar-Fernández, J., Navarro, R.E., Salazar-Martínez, A.M., Pérez-Andrade, M.E., and Miranda-Ríos, J. (2018). *Caenorhabditis elegans* respond to high-glucose diets through a network of stress-responsive transcription factors. *PLoS One* *13*, 1–24.
- Baker, B.M., Nargund, A.M., Sun, T., and Haynes, C.M. (2012). Protective coupling of mitochondrial function and protein synthesis via the eIF2 $\alpha$  kinase GCN-2. *PLoS Genet.* *8*, e1002760.
- Bito, T., Misaki, T., Yabuta, Y., Ishikawa, T., Kawano, T., and Watanabe, F. (2017). Vitamin B12 deficiency results in severe oxidative stress, leading to memory retention impairment in *Caenorhabditis elegans*. *Redox Biol.* *11*, 21–29.
- Brenner, S. (1974). The genetics of *Caenorhabditis elegans*. *Genetics* *77*, 71–94.
- Brooks, K.K., Liang, B., and Watts, J.L. (2009). The influence of bacterial diet on fat storage in *C. elegans*. *PLoS One* *4*, e7545.
- Butterfield, D.A., and Halliwell, B. (2019). Oxidative stress, dysfunctional glucose metabolism and Alzheimer disease. *Nat. Rev. Neurosci.* *20*, 148-160.
- Cabreiro, F., Au, C., Leung, K.Y., Vergara-Irigaray, N., Cochemé, H.M., Noori, T., Weinkove, D., Schuster, E., Greene, N.D.E., and Gems, D. (2013). Metformin retards aging in *C. elegans* by altering microbial folate and methionine metabolism. *Cell* *153*, 228-39.
- Cacho-Valadez, B., Muñoz-Lobato, F., Pedrajas, J.R., Cabello, J., Fierro-González, J.C., Navas, P., Swoboda, P., Link, C.D., and Miranda-Vizuete, A. (2012). The Characterization of the *Caenorhabditis elegans* Mitochondrial Thioredoxin System Uncovers an Unexpected Protective Role of Thioredoxin Reductase 2 in  $\beta$ -Amyloid Peptide Toxicity. *Antioxid. Redox Signal.* *16*, 1384–1400.
- Chakravorty, A., Jetto, C.T., and Manjithaya, R. (2019). Dysfunctional Mitochondria and Mitophagy as Drivers of Alzheimer’s Disease Pathogenesis. *Front. Aging Neurosci.* *11*, 311.
- Chartier-Harlin, M.C., Crawford, F., Houlden, H., Warren, A., Hughes, D., Fidani, L., Goate, A., Rossor, M., Roques, P., Hardy, J., et al. (1991). Early-onset Alzheimer’s disease caused by mutations at codon 717 of the  $\beta$ -amyloid precursor protein gene. *Nature* *353*, 844–846.
- Chaya, T., Patel, S., Smith E.M., Lam, A., Miller, E.N., Clupper, M., Kervin, K., and Tanis, J.E. (2021). A *C. elegans* genome-wide RNAi screen for altered levamisole sensitivity identifies genes required for muscle function. *G3 Genes, Genomes, Genet.* in press <https://doi.org/10.1101/2020.12.01.407213>.
- Clarke, R., Bennett, D., Parish, S., Lewington, S., Skeaff, M., Eussen, S.J.P.M., Lewerin, C., Stott, D.J., Armitage, J., Hankey, G.J., et al. (2014). Effects of homocysteine lowering with B vitamins on cognitive aging: Meta-analysis of 11 trials with cognitive data on 22,000 individuals. *Am. J. Clin. Nutr.* *100*, 657–666.

- Cogliati, S., Clementi, V., Francisco, M., Crespo, C., Argañaraz, F., and Grau, R. (2020). *Bacillus Subtilis* Delays Neurodegeneration and Behavioral Impairment in the Alzheimer's Disease Model *Caenorhabditis Elegans*. *J. Alzheimers. Dis.* 73, 1035-1052.
- Deline, M.L., Vrablik, T.L., and Watts, J.L. (2013). Dietary Supplementation of Polyunsaturated Fatty Acids in *Caenorhabditis elegans*. *J. Vis. Exp.* 50879.
- Drake, J., Link, C.D., and Butterfield, D.A. (2003). Oxidative stress precedes fibrillar deposition of Alzheimer's disease amyloid  $\beta$ -peptide (1-42) in a transgenic *Caenorhabditis elegans* model. *Neurobiol. Aging* 24, 415–420.
- Fang, E.F., Hou, Y., Palikaras, K., Adriaanse, B.A., Kerr, J.S., Yang, B., Lautrup, S., Hasan-Olive, M.M., Caponio, D., Dan, X., et al. (2019). Mitophagy inhibits amyloid- $\beta$  and tau pathology and reverses cognitive deficits in models of Alzheimer's disease. *Nat. Neurosci.* 22, 401-412.
- Fong, S., Teo, E., Ng, L.F., Chen, C.B., Lakshmanan, L.N., Tsoi, S.Y., Moore, P.K., Inoue, T., Halliwell, B., and Gruber, J. (2016). Energy crisis precedes global metabolic failure in a novel *Caenorhabditis elegans* Alzheimer Disease model. *Sci. Rep.* 6, 33781.
- Fonte, V., Dostal, V., Roberts, C.M., Gonzales, P., Lacor, P., Magrane, J., Dingwell, N., Fan, E.Y., Silverman, M.A., Stein, G.H., et al. (2011). A glycine zipper motif mediates the formation of toxic  $\beta$ -amyloid oligomers in vitro and in vivo. *Mol. Neurodegener.* 6, 61.
- Ford, A.H., and Almeida, O.P. (2019). Effect of Vitamin B Supplementation on Cognitive Function in the Elderly: A Systematic Review and Meta-Analysis. *Drugs and Aging* 36, 419–434.
- Goate, A., Chartier-Harlin, M.C., Mullan, M., Brown, J., Crawford, F., Fidani, L., Giuffra, L., Haynes, A., Irving, N., James, L., et al. (1991). Segregation of a missense mutation in the amyloid precursor protein gene with familial Alzheimer's disease. *Nature* 349, 704–706.
- Grandison, R.C., Piper, M.D.W., and Partridge, L. (2009). Amino-acid imbalance explains extension of lifespan by dietary restriction in *Drosophila*. *Nature* 462, 1061-4.
- Green, R., Allen, L.H., Bjørke-Monsen, A.L., Brito, A., Guéant, J.L., Miller, J.W., Molloy, A.M., Nexø, E., Stabler, S., Toh, B.H., et al. (2017). Vitamin B12 deficiency. *Nat. Rev. Dis. Prim.* 3, 17040
- Han, B., Sivaramakrishnan, P., Lin, C.C.J., Neve, I.A.A., He, J., Tay, L.W.R., Sowa, J.N., Sizovs, A., Du, G., Wang, J., et al. (2017). Microbial Genetic Composition Tunes Host Longevity. *Cell* 169, 1249-1262.
- Hassan, W.M., Dostal, V., Huemann, B.N., Yerg, J.E., and Link, C.D. (2015). Identifying  $A\beta$ -specific pathogenic mechanisms using a nematode model of Alzheimer's disease. *Neurobiol. Aging* 36, 857–866.
- Kang, J.H., Cook, N., Manson, J.A., Buring, J.E., Albert, C.M., and Grodstein, F. (2008). A trial of B vitamins and cognitive function among women at high risk of cardiovascular disease. *Am. J. Clin. Nutr.* 88, 1602–1610.
- Lee, S.J., Murphy, C.T., and Kenyon, C. (2009). Glucose Shortens the Life Span of *C. elegans* by Downregulating DAF-16/FOXO Activity and Aquaporin Gene Expression. *Cell Metab.* 10, 379-91.

- Lin, C.C.J., and Wang, M.C. (2017). Microbial metabolites regulate host lipid metabolism through NR5A-Hedgehog signalling. *Nat. Cell Biol.* 19, 550-557.
- Lin, M.T., and Beal, M.F. (2006). Mitochondrial dysfunction and oxidative stress in neurodegenerative diseases. *Nature* 443, 787-95.
- Link, C.D. (1995). Expression of human  $\beta$ -amyloid peptide in transgenic *Caenorhabditis elegans*. *Proc. Natl. Acad. Sci. U. S. A.* 92, 9368-72.
- Long, J.M., and Holtzman, D.M. (2019). Alzheimer Disease: An Update on Pathobiology and Treatment Strategies. *Cell* 179, 312-339.
- Lublin, A.L., and Link, C.D. (2013). Alzheimer's disease drug discovery: In vivo screening using *Caenorhabditis elegans* as a model for  $\beta$ -amyloid peptide-induced toxicity. *Drug Discov. Today Technol.* 10, e115-9.
- MacNeil, L.T., Watson, E., Arda, H.E., Zhu, L.J., and Walhout, A.J.M. (2013). Diet-induced developmental acceleration independent of TOR and insulin in *C. elegans*. *Cell* 153, 240-52.
- McColl, G., Roberts, B.R., Pukala, T.L., Kenche, V.B., Roberts, C.M., Link, C.D., Ryan, T.M., Masters, C.L., Barnham, K.J., Bush, A.I., et al. (2012). Utility of an improved model of amyloid-beta ( $A\beta$ 1-42) toxicity in *Caenorhabditis elegans* for drug screening for Alzheimer's disease. *Mol. Neurodegener.* 7, 57.
- Neve, I.A.A., Sowa, J.N., Lin, C.C.J., Sivaramakrishnan, P., Herman, C., Ye, Y., Han, L., and Wang, M.C. (2020). *Escherichia coli* metabolite profiling leads to the development of an RNA interference strain for *Caenorhabditis elegans*. *G3 Genes, Genomes, Genet.* 10, 189-198.
- Orentreich, N., Matias, J.R., DeFelice, A., and Zimmerman, J.A. (1993). Low methionine ingestion by rats extends life span. *J. Nutr.* 123, 269-74.
- Palikaras, K., Lionaki, E., and Tavernarakis, N. (2015). Coordination of mitophagy and mitochondrial biogenesis during ageing in *C. elegans*. *Nature* 521, 525-8.
- Revtovich, A. V., Lee, R., and Kirienko, N. V. (2019). Interplay between mitochondria and diet mediates pathogen and stress resistance in *caenorhabditis elegans*. *PLoS Genet.* 15, e1008011.
- Rousakis, A., Vlassis, A., Vlanti, A., Patera, S., Thireos, G., and Syntichaki, P. (2013). The general control nonderepressible-2 kinase mediates stress response and longevity induced by target of rapamycin inactivation in *Caenorhabditis elegans*. *Aging Cell.* 12, 742-51.
- Schulz, T.J., Zarse, K., Voigt, A., Urban, N., Birringer, M., and Ristow, M. (2007). Glucose Restriction Extends *Caenorhabditis elegans* Life Span by Inducing Mitochondrial Respiration and Increasing Oxidative Stress. *Cell Metab.* 6, 280-93.
- Shen, X., Ellis, R.E., Sakaki, K., and Kaisfman, R.J. (2005). Genetic interactions due to constitutive inducible gene regulation mediated by the unfolded protein in *C. elegans*. *PLoS Genet.* 1, e37.
- Shtonda, B.B., and Avery, L. (2006). Dietary choice behavior in *Caenorhabditis elegans*. *J. Exp. Biol.* 209, 89-102.



- Smith, A.D., and Refsum, H. (2016). Homocysteine, B Vitamins, and Cognitive Impairment. *Annu. Rev. Nutr.* 36, 211-39.
- Smith, A.D., Smith, S.M., de Jager, C.A., Whitbread, P., Johnston, C., Agacinski, G., Oulhaj, A., Bradley, K.M., Jacoby, R., and Refsum, H. (2010). Homocysteine-lowering by b vitamins slows the rate of accelerated brain atrophy in mild cognitive impairment: A randomized controlled trial. *PLoS One* 5, 1–10.
- Sorrentino, V., Romani, M., Mouchiroud, L., Beck, J.S., Zhang, H., D’Amico, D., Moullan, N., Potenza, F., Schmid, A.W., Rietsch, S., et al. (2017). Enhancing mitochondrial proteostasis reduces amyloid- $\beta$  proteotoxicity. *Nature* 552, 187–193.
- Steinkraus, K.A., Smith, E.D., Davis, C., Carr, D., Pendergrass, W.R., Sutphin, G.L., Kennedy, B.K., and Kaeberlein, M. (2008). Dietary restriction suppresses proteotoxicity and enhances longevity by an hsf-1-dependent mechanism in *Caenorhabditis elegans*. *Aging Cell* 7, 394-404.
- Teo, E., Ravi, S., Barardo, D., Kim, H.S., Fong, S., Gassiot, A.C., Tan, T.Y., Ching, J., Kovalik, J.P., Wenk, M.R., et al. (2019). Metabolic stress is a primary pathogenic event in transgenic *Caenorhabditis elegans* expressing pan-neuronal human amyloid beta. *Elife* 8, e50069.
- Thelen, M., and Brown-Borg, H.M. (2020). Does Diet Have a Role in the Treatment of Alzheimer’s Disease? *Front. Aging Neurosci.* 12, 617071.
- Touroutine, D., and Tanis, J.E. (2020). A Rapid, SuperSelective Method for Detection of Single Nucleotide Variants in *Caenorhabditis elegans*. *Genetics* 216, 343-352.
- Virk, B., Correia, G., Dixon, D.P., Feyst, I., Jia, J., Oberleitner, N., Briggs, Z., Hodge, E., Edwards, R., Ward, J., et al. (2012). Excessive folate synthesis limits lifespan in the *C. elegans*: *E. coli* aging model. *BMC Biol.* 10, 67.
- Virk, B., Jia, J., Maynard, C.A., Raimundo, A., Lefebvre, J., Richards, S.A., Chetina, N., Liang, Y., Helliwell, N., Cipinska, M., et al. (2016). Folate Acts in *E. coli* to Accelerate *C. elegans* Aging Independently of Bacterial Biosynthesis. *Cell Rep.* 14, 1611-1620.
- Vogiatzoglou, A., Refsum, H., Johnston, C., Smith, S.M., Bradley, K.M., De Jager, C., Budge, M.M., and Smith, A.D. (2008). Vitamin B12 status and rate of brain volume loss in community-dwelling elderly. *Neurology* 71, 826–832.
- Wang, X., Wang, W., Li, L., Perry, G., Lee, H. gon, and Zhu, X. (2014). Oxidative stress and mitochondrial dysfunction in Alzheimer’s disease. *Biochim. Biophys. Acta* 1842, 1240-7.
- Watson, E., Macneil, L.T., Ritter, A.D., Yilmaz, L.S., Rosebrock, A.P., Caudy, A.A., and Walhout, A.J.M. (2014). Interspecies systems biology uncovers metabolites affecting *C. elegans* gene expression and life history traits. *Cell* 156, 759–770.
- Watson, E., Olin-Sandoval, V., Hoy, M.J., Li, C.H., Louise, T., Yao, V., Mori, A., Holdorf, A.D., Troyanskaya, O.G., Ralser, M., et al. (2016). Metabolic network rewiring of propionate flux compensates vitamin B12 deficiency in *C. elegans*. *Elife* 5, e17670.
- Wei, W., and Ruvkun, G. (2020). Lysosomal activity regulates *Caenorhabditis elegans* mitochondrial dynamics through vitamin B12 metabolism. *Proc. Natl. Acad. Sci. U. S. A.* 117, 19970-19981.

Yoon, D., Lee, M.-H., and Cha, D. (2018). Measurement of Intracellular ROS in *Caenorhabditis elegans* Using 2',7'-Dichlorodihydrofluorescein Diacetate. *Bio. Protoc.* 8, e2774.



## Figure 1

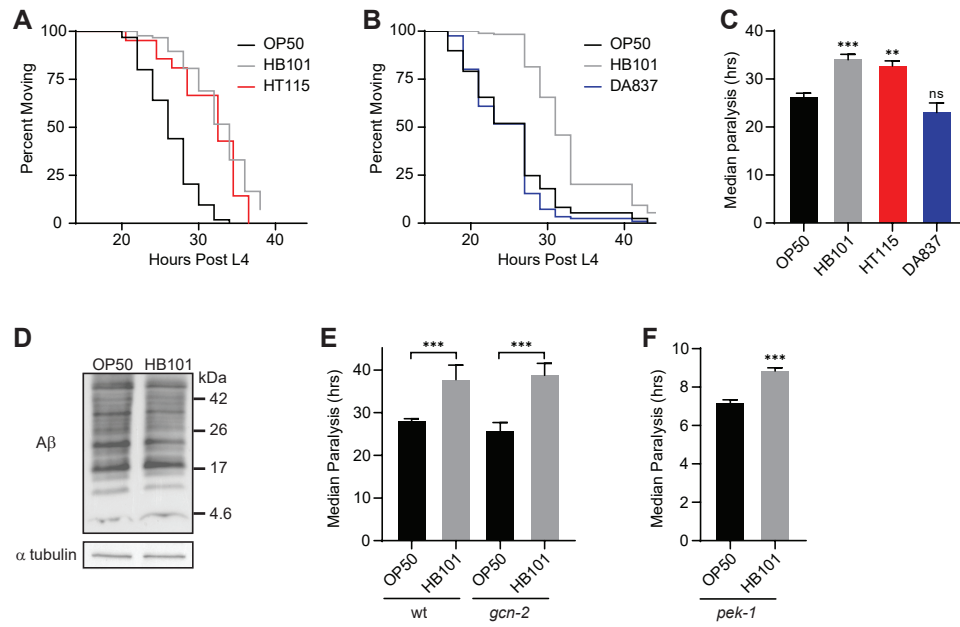

**Figure 2**

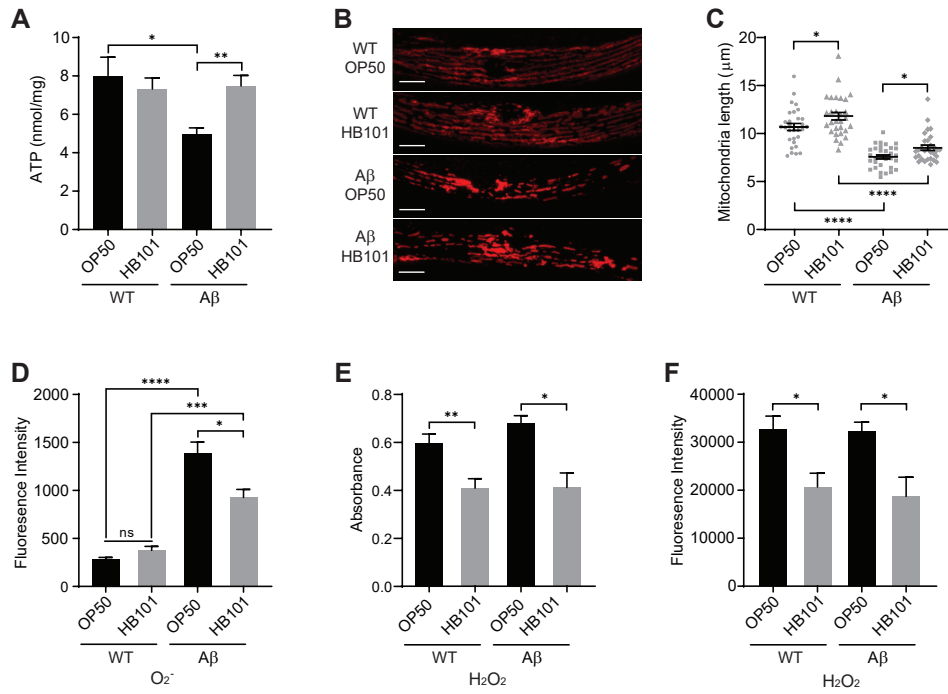

### Figure 3

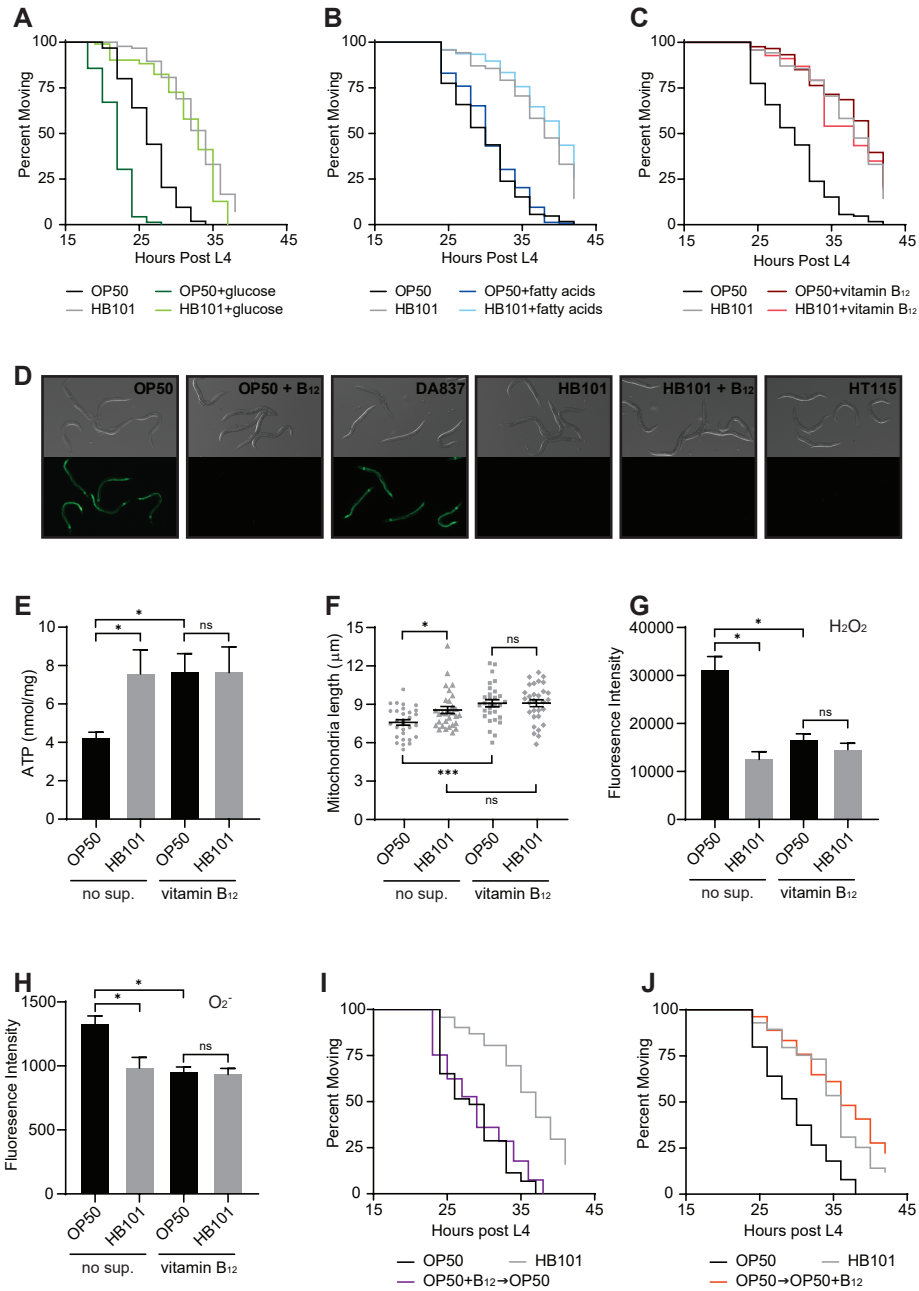

**Figure 4**

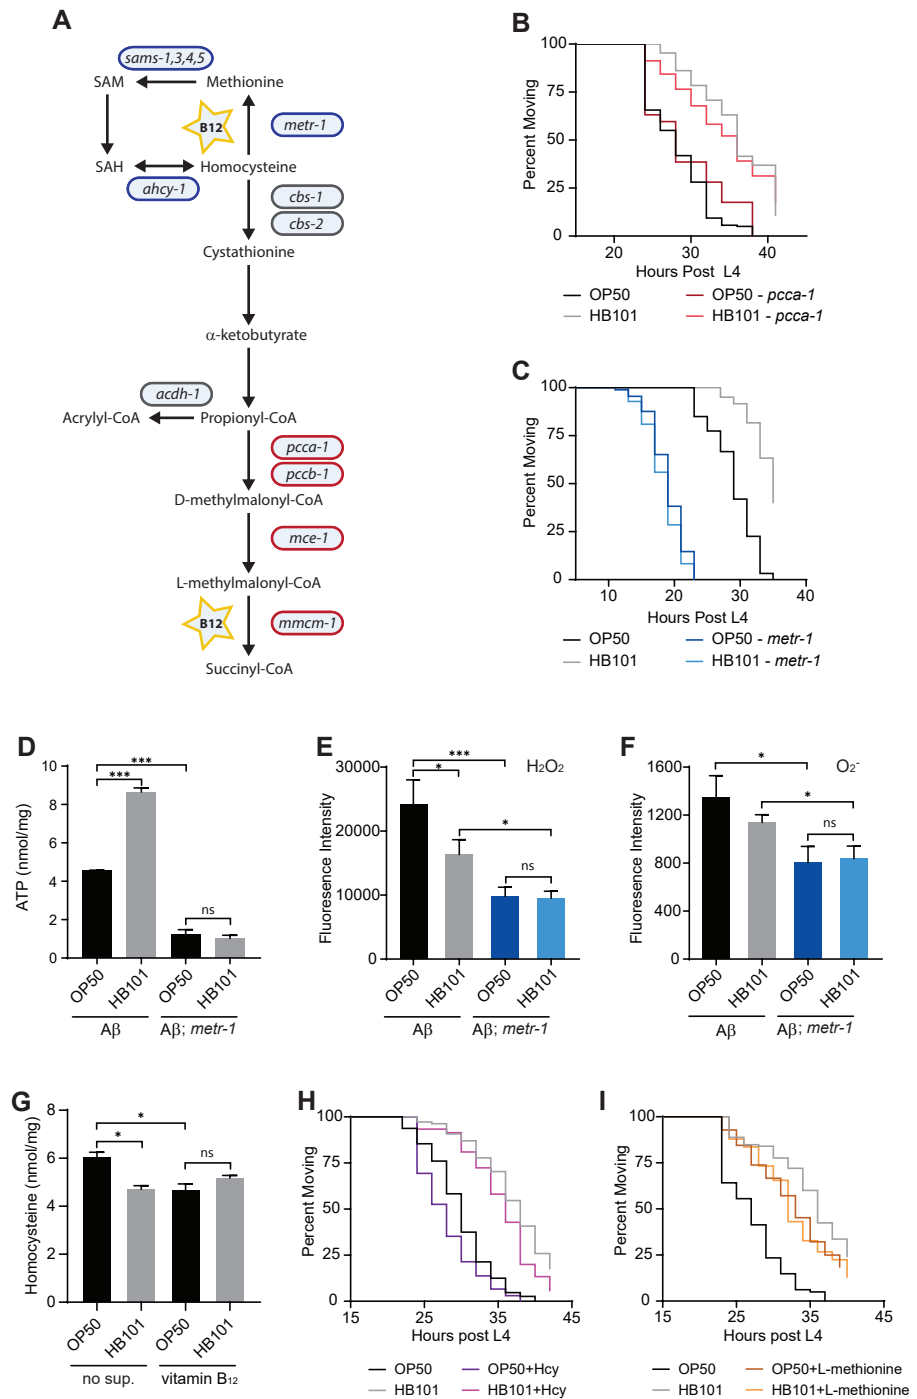

## Supplemental Figure 1

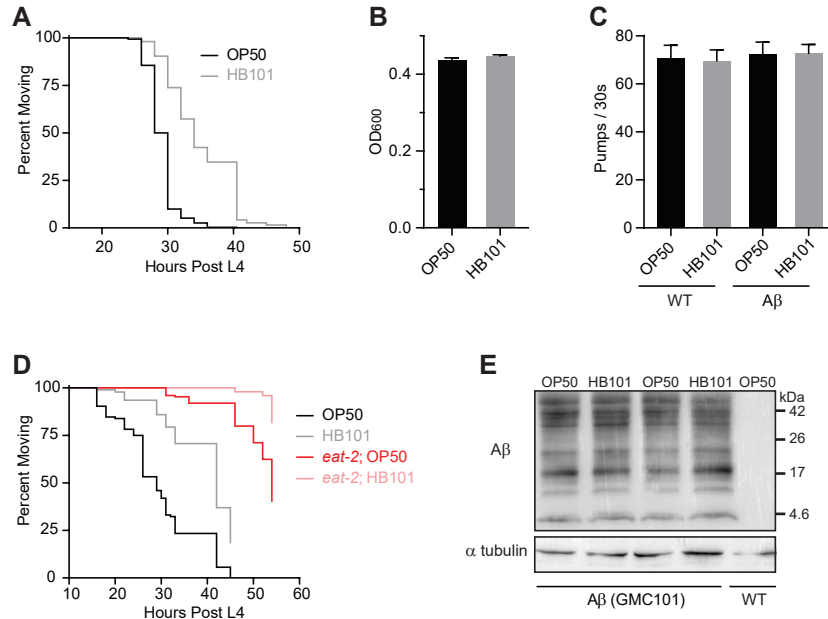

## Supplemental Figure 2

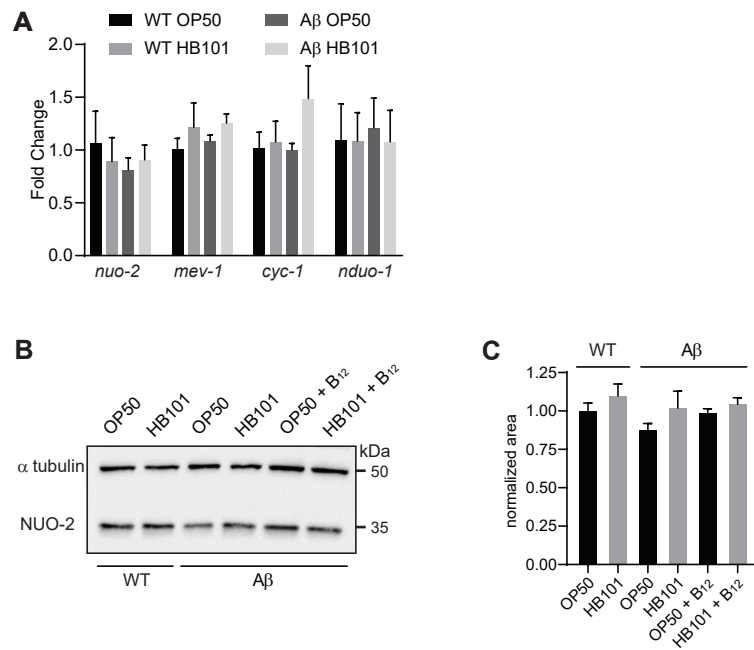

### Supplemental Figure 3

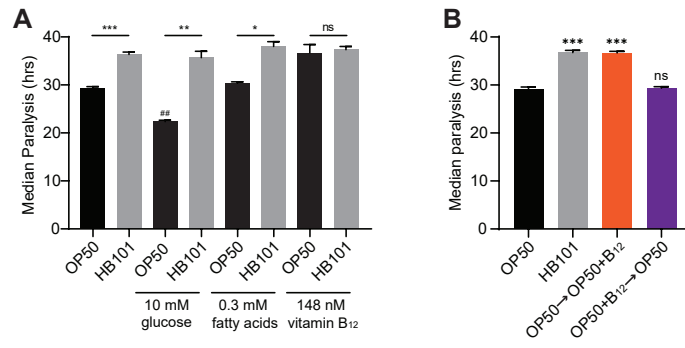

## Supplemental Figure 4

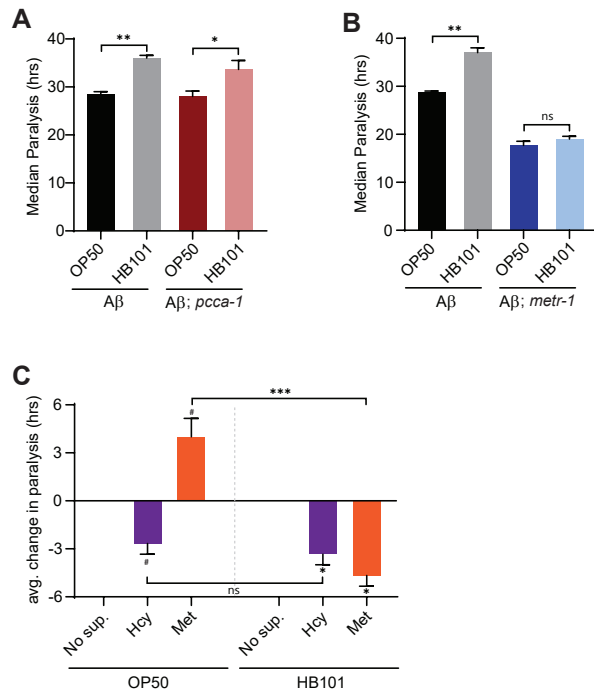

Source: https://biorxiv.org/content/10.1101/2021.02.22.432392v1.full.pdf
